# Supplementary material
Source: ML conference proceedings conference paper supplement (https://proceedings.mlr.press/v139/verma21a.html)
Supplement: Supplementary file [file verma21a-supp.pdf]

# Appendix

## A. Additional Discussion on Theoretical Analysis

**On the interpretation of Theorem 1.** In Theorem 1, the distribution  $\mathcal{D}$  is arbitrary. For example, if the number of samples generated during training is finite and  $n$ , then the simplest way to instantiate Theorem 1 is to set  $\mathcal{D}$  to represent the empirical measure  $\frac{1}{n} \sum_{i=1}^m \delta_{(x_i, y_i)}$  for training data  $((x_i, y_i))_{i=1}^m$  (where the Dirac measures  $\delta_{(x_i, y_i)}$ ), which yields the following:

$$\begin{aligned} & \frac{1}{n^2} \sum_{i=1}^m \sum_{j=1}^m \mathbb{E}_{\substack{\bar{\mathbf{x}}, \tilde{\mathbf{x}}', \tilde{\mathbf{x}}'' \sim \mathcal{D}_{\bar{\mathbf{x}}} \\ \alpha, \alpha', \alpha'' \sim \mathcal{D}_{\alpha}}} [\ell_{\text{ctr}}(\mathbf{x}_i^+, \mathbf{x}_i^{++}, \mathbf{x}_j^-)] \\ &= \frac{1}{n^2} \sum_{i=1}^m \sum_{j \in S_{y_i}} \mathbb{E}_{\substack{\bar{\mathbf{x}}, \tilde{\mathbf{x}}', \tilde{\mathbf{x}}'' \sim \mathcal{D}_{\bar{\mathbf{x}}} \\ \alpha, \alpha', \alpha'' \sim \mathcal{D}_{\alpha}}} [\ell_{\text{cf}}(f(\mathbf{x}_i^+), y_i)] + \frac{1}{n^2} \sum_{i=1}^n [(n - |S_{y_i}|) \mathcal{E}_y], \end{aligned}$$

where  $\mathbf{x}_i^+ = \mathbf{x}_i + \alpha \delta(\mathbf{x}_i, \tilde{\mathbf{x}})$ ,  $\mathbf{x}_i^{++} = \mathbf{x}_i + \alpha' \delta(\mathbf{x}_i, \tilde{\mathbf{x}}')$ ,  $\mathbf{x}_j^- = \bar{\mathbf{x}}_j + \alpha'' \delta(\bar{\mathbf{x}}_j, \tilde{\mathbf{x}}'')$ ,  $S_y = \{i \in [m] : y_i \neq y\}$ ,  $f(\mathbf{x}_i^+) = \|(h(\mathbf{x}_i^+) \|^{-1} h(\mathbf{x}_i^+)^\top \tilde{w}\|$ , and  $[m] = \{1, \dots, m\}$ . Here, we used the fact that  $\bar{\rho}(y) = \frac{|S_y|}{n}$  where  $|S_y|$  is the number of elements in the set  $S_y$ . In general, in Theorem 1, we can set the distribution  $\mathcal{D}$  to take into account additional data augmentations (that generate infinite number of samples) and the different ways that we generate positive and negative pairs.

**On the interpretation of Theorem 2 for deep neural networks.** Consider the case of deep neural networks with ReLU in the form of  $f(\mathbf{x}) = W^{(H)} \sigma^{(H-1)}(W^{(H-1)} \sigma^{(H-2)}(\dots \sigma^{(1)}(W^{(1)} \mathbf{x}) \dots))$ , where  $W^{(l)}$  is the weight matrix and  $\sigma^{(l)}$  is the ReLU nonlinear function at the  $l$ -th layer. In this case, we have

$$\|\nabla f(\mathbf{x})\| = \|W^{(H)} \dot{\sigma}^{(H-1)} W^{(H-1)} \dot{\sigma}^{(H-2)} \dots \dot{\sigma}^{(1)} W^{(1)}\|,$$

where  $\dot{\sigma}^{(l)} = \frac{\partial \sigma^{(l)}(q)}{\partial q} \big|_{q=W^{(l-1)} \sigma^{(l-2)}(\dots \sigma^{(1)}(W^{(1)} \mathbf{x}) \dots)}$  is a Jacobian matrix and hence  $W^{(H)} \dot{\sigma}^{(H-1)} W^{(H-1)} \dot{\sigma}^{(H-2)} \dots \dot{\sigma}^{(1)} W^{(1)}$  is the sum of the product of path weights. Thus, regularizing  $\|\nabla f(\mathbf{x})\|$  tends to promote generalization as it corresponds to the path weight norm used in generalization error bounds in previous work (Kawaguchi et al., 2017).

## B. Proof

In this section, we present complete proofs for our theoretical results. We note that in the proofs and in theorems, the distribution  $\mathcal{D}$  is arbitrary. As an simplest example of the practical setting, we can set  $\mathcal{D}$  to represent the empirical measure  $\frac{1}{n} \sum_{i=1}^m \delta_{(x_i, y_i)}$  for training data  $((x_i, y_i))_{i=1}^m$  (where the Dirac measures  $\delta_{(x_i, y_i)}$ ), which yields the following:

$$\mathbb{E}_{\substack{\mathbf{x}, \bar{\mathbf{x}} \sim \mathcal{D}_{\mathbf{x}} \\ \tilde{\mathbf{x}}, \tilde{\mathbf{x}}', \tilde{\mathbf{x}}'' \sim \mathcal{D}_{\tilde{\mathbf{x}}} \\ \alpha, \alpha', \alpha'' \sim \mathcal{D}_{\alpha}}} [\ell_{\text{ctr}}(\mathbf{x}^+, \mathbf{x}^{++}, \mathbf{x}^-)] = \frac{1}{n^2} \sum_{i=1}^m \sum_{j=1}^m \mathbb{E}_{\substack{\bar{\mathbf{x}}, \tilde{\mathbf{x}}', \tilde{\mathbf{x}}'' \sim \mathcal{D}_{\bar{\mathbf{x}}} \\ \alpha, \alpha', \alpha'' \sim \mathcal{D}_{\alpha}}} [\ell_{\text{ctr}}(\mathbf{x}_i^+, \mathbf{x}_i^{++}, \mathbf{x}_j^-)], \quad (11)$$

where  $\mathbf{x}_i^+ = \mathbf{x}_i + \alpha \delta(\mathbf{x}_i, \tilde{\mathbf{x}})$ ,  $\mathbf{x}_i^{++} = \mathbf{x}_i + \alpha' \delta(\mathbf{x}_i, \tilde{\mathbf{x}}')$ , and  $\mathbf{x}_j^- = \bar{\mathbf{x}}_j + \alpha'' \delta(\bar{\mathbf{x}}_j, \tilde{\mathbf{x}}'')$ . In equation (11), we can more easily see that for each single point  $x_i$ , we have the  $m$  negative examples as:

$$\sum_{j=1}^m \mathbb{E}_{\substack{\bar{\mathbf{x}}, \tilde{\mathbf{x}}', \tilde{\mathbf{x}}'' \sim \mathcal{D}_{\bar{\mathbf{x}}} \\ \alpha, \alpha', \alpha'' \sim \mathcal{D}_{\alpha}}} [\ell_{\text{ctr}}(\mathbf{x}_i^+, \mathbf{x}_i^{++}, \mathbf{x}_j^-)].$$

Thus, for each single point  $x_i$ , all points generated based on all other points  $\bar{x}_j$  for  $j = 1, \dots, m$  are treated as negatives, whereas the positives are the ones generated based on the particular point  $x_i$ . The ratio of negatives increases as the number of original data points increases and our proofs apply for any number of original data points.

### B.1. Proof of Theorem 1

We begin by introducing additional notation to be used in our proof. For two vectors  $\mathbf{q}$  and  $\mathbf{q}'$ , define

$$\overline{\text{cov}}[\mathbf{q}, \mathbf{q}'] = \sum_k \text{cov}(\mathbf{q}_k, \mathbf{q}'_k)$$

Let  $\rho_y = \mathbb{E}_{\bar{y}|y}[1_{[\bar{y}=y]}] = \sum_{\bar{y} \in \{0,1\}} p_{\bar{y}}(\bar{y} | y) 1_{[\bar{y}=y]} = \Pr(\bar{y} = y | y)$ . For the completeness, we first recall the following well known fact:

**Lemma 1.** For any  $y \in \{0, 1\}$  and  $q \in \mathbb{R}$ ,

$$\ell(q, y) = -\log \left( \frac{\exp(yq)}{1 + \exp(q)} \right)$$

*Proof.* By simple arithmetic manipulations,

$$\begin{aligned} \ell(q, y) &= -y \log \left( \frac{1}{1 + \exp(-q)} \right) - (1 - y) \log \left( 1 - \frac{1}{1 + \exp(-q)} \right) \\ &= -y \log \left( \frac{1}{1 + \exp(-q)} \right) - (1 - y) \log \left( \frac{\exp(-q)}{1 + \exp(-q)} \right) \\ &= -y \log \left( \frac{\exp(q)}{1 + \exp(q)} \right) - (1 - y) \log \left( \frac{1}{1 + \exp(q)} \right) \\ &= \begin{cases} -\log \left( \frac{\exp(q)}{1 + \exp(q)} \right) & \text{if } y = 1 \\ -\log \left( \frac{1}{1 + \exp(q)} \right) & \text{if } y = 0 \end{cases} \\ &= -\log \left( \frac{\exp(yq)}{1 + \exp(q)} \right). \end{aligned}$$

□

Before starting the main parts of the proof, we also prepare the following simple facts:

**Lemma 2.** For any  $(\mathbf{x}^+, \mathbf{x}^{++}, \mathbf{x}^-)$ , we have

$$\ell_{\text{ctr}}(\mathbf{x}^+, \mathbf{x}^{++}, \mathbf{x}^-) = \ell(\text{sim}[h(\mathbf{x}^+), h(\mathbf{x}^{++})] - \text{sim}[h(\mathbf{x}^+), h(\mathbf{x}^-)], 1)$$

*Proof.* By simple arithmetic manipulations,

$$\begin{aligned} \ell_{\text{ctr}}(\mathbf{x}^+, \mathbf{x}^{++}, \mathbf{x}^-) &= -\log \frac{\exp(\text{sim}[h(\mathbf{x}^+), h(\mathbf{x}^{++})])}{\exp(\text{sim}[h(\mathbf{x}^+), h(\mathbf{x}^{++})]) + \exp(\text{sim}[h(\mathbf{x}^+), h(\mathbf{x}^-)])} \\ &= -\log \frac{1}{1 + \exp(\text{sim}[h(\mathbf{x}^+), h(\mathbf{x}^-)] - \text{sim}[h(\mathbf{x}^+), h(\mathbf{x}^{++})])} \\ &= -\log \frac{\exp(\text{sim}[h(\mathbf{x}^+), h(\mathbf{x}^{++})] - \text{sim}[h(\mathbf{x}^+), h(\mathbf{x}^-)])}{1 + \exp(\text{sim}[h(\mathbf{x}^+), h(\mathbf{x}^{++})] - \text{sim}[h(\mathbf{x}^+), h(\mathbf{x}^-)])} \end{aligned}$$

Using Lemma 1 with  $q = \text{sim}[h(\mathbf{x}^+), h(\mathbf{x}^{++})] - \text{sim}[h(\mathbf{x}^+), h(\mathbf{x}^-)]$ , this yields the desired statement. □

**Lemma 3.** For any  $y \in \{0, 1\}$  and  $q \in \mathbb{R}$ ,

$$\ell(-q, 1) = \ell(q, 0).$$

*Proof.* Using Lemma 1,

$$\ell(-q, 1) = -\log \left( \frac{\exp(-q)}{1 + \exp(-q)} \right) = -\log \left( \frac{1}{1 + \exp(q)} \right) = \ell(q, 0).$$

□

With these facts, we are now ready to start our proof. We first prove the relationship between the contrastive loss and classification loss under an ideal situation:



Using the above the relationship under the ideal situation, we now proves the relationship under the practical situation:

**Lemma 5.** Assume that  $\mathbf{x}^+ = \mathbf{x} + \alpha\delta(\mathbf{x}, \tilde{\mathbf{x}})$ ,  $\mathbf{x}^{++} = \mathbf{x} + \alpha'\delta(\mathbf{x}, \tilde{\mathbf{x}}')$ ,  $\mathbf{x}^- = \bar{\mathbf{x}} + \alpha''\delta(\bar{\mathbf{x}}, \tilde{\mathbf{x}}'')$ , and  $\text{sim}[z, z'] = \frac{z^\top z'}{\zeta(z)\zeta(z')}$  where  $\zeta : z \mapsto \zeta(z) \in \mathbb{R}$ . Then for any  $(\alpha, \tilde{\mathbf{x}}, \delta, \zeta, y)$ , we have that

$$\begin{aligned} & \mathbb{E}_{\bar{y}|y} \mathbb{E}_{\mathbf{x} \sim \mathcal{D}_y} \mathbb{E}_{\substack{\tilde{\mathbf{x}} \sim \mathcal{D}_{\bar{y}} \\ \alpha', \alpha'' \sim \mathcal{D}_\alpha}} \mathbb{E}_{\tilde{\mathbf{x}}', \tilde{\mathbf{x}}'' \sim \mathcal{D}_{\tilde{\mathbf{x}}}} [\ell_{\text{ctr}}(\mathbf{x}^+, \mathbf{x}^{++}, \mathbf{x}^-)] \\ &= (1 - \rho_y) \mathbb{E}_{\substack{\mathbf{x} \sim \mathcal{D}_y \\ \tilde{\mathbf{x}} \sim \mathcal{D}_{\bar{y} \neq y}}} \mathbb{E}_{\substack{\tilde{\mathbf{x}}', \tilde{\mathbf{x}}'' \sim \mathcal{D}_{\tilde{\mathbf{x}}} \\ \alpha', \alpha'' \sim \mathcal{D}_\alpha}} \left[ \ell \left( \frac{h(\mathbf{x}^+)^\top \tilde{w}}{\zeta(h(\mathbf{x}^+))}, y \right) \right] + \rho_y E \end{aligned}$$

where

$$\begin{aligned} E &= \mathbb{E}_{\mathbf{x}, \tilde{\mathbf{x}} \sim \mathcal{D}_y} \mathbb{E}_{\substack{\tilde{\mathbf{x}}', \tilde{\mathbf{x}}'' \sim \mathcal{D}_{\tilde{\mathbf{x}}} \\ \alpha', \alpha'' \sim \mathcal{D}_\alpha}} \left[ \log \left( 1 + \exp \left[ -\frac{h(\mathbf{x}^+)^\top}{\zeta(h(\mathbf{x}^+))} \left( \frac{h(\mathbf{x}^{++})}{\zeta(h(\mathbf{x}^{++}))} - \frac{h(\mathbf{x}^-)}{\zeta(h(\mathbf{x}^-))} \right) \right] \right) \right] \\ &\geq \log \left( 1 + \exp \left[ -\overline{\text{cov}}_{\substack{\mathbf{x} \sim \mathcal{D}_y \\ \tilde{\mathbf{x}}' \sim \mathcal{D}_{\tilde{\mathbf{x}}} \\ \alpha' \sim \mathcal{D}_\alpha}} \left[ \frac{h(\mathbf{x}^+)}{\zeta(h(\mathbf{x}^+))}, \frac{h(\mathbf{x}^{++})}{\zeta(h(\mathbf{x}^{++}))} \right] \right] \right) \end{aligned}$$

*Proof.* Using Lemma 4,

$$\begin{aligned} & \mathbb{E}_{\bar{y}|y} \mathbb{E}_{\mathbf{x} \sim \mathcal{D}_y} \mathbb{E}_{\substack{\tilde{\mathbf{x}} \sim \mathcal{D}_{\bar{y}} \\ \alpha', \alpha'' \sim \mathcal{D}_\alpha}} \mathbb{E}_{\tilde{\mathbf{x}}', \tilde{\mathbf{x}}'' \sim \mathcal{D}_{\tilde{\mathbf{x}}}} [\ell_{\text{ctr}}(\mathbf{x}^+, \mathbf{x}^{++}, \mathbf{x}^-)] \\ &= \sum_{\bar{y} \in \{0,1\}} p_{\bar{y}}(\bar{y} | y) \mathbb{E}_{\substack{\mathbf{x} \sim \mathcal{D}_y \\ \tilde{\mathbf{x}} \sim \mathcal{D}_{\bar{y}}}} \mathbb{E}_{\substack{\tilde{\mathbf{x}}', \tilde{\mathbf{x}}'' \sim \mathcal{D}_{\tilde{\mathbf{x}}} \\ \alpha', \alpha'' \sim \mathcal{D}_\alpha}} [\ell_{\text{ctr}}(\mathbf{x}^+, \mathbf{x}^{++}, \mathbf{x}^-)] \\ &= \Pr(\bar{y} = 0 | y) \mathbb{E}_{\substack{\mathbf{x} \sim \mathcal{D}_y \\ \tilde{\mathbf{x}} \sim \mathcal{D}_{\bar{y}=0}, \\ \tilde{\mathbf{x}}', \tilde{\mathbf{x}}'' \sim \mathcal{D}_{\tilde{\mathbf{x}}}, \\ \alpha', \alpha'' \sim \mathcal{D}_\alpha}} [\ell_{\text{ctr}}(\mathbf{x}^+, \mathbf{x}^{++}, \mathbf{x}^-)] + \Pr(\bar{y} = 1 | y) \mathbb{E}_{\substack{\mathbf{x} \sim \mathcal{D}_y \\ \tilde{\mathbf{x}} \sim \mathcal{D}_{\bar{y}=1}, \\ \tilde{\mathbf{x}}', \tilde{\mathbf{x}}'' \sim \mathcal{D}_{\tilde{\mathbf{x}}}, \\ \alpha', \alpha'' \sim \mathcal{D}_\alpha}} [\ell_{\text{ctr}}(\mathbf{x}^+, \mathbf{x}^{++}, \mathbf{x}^-)] \\ &= \Pr(\bar{y} \neq y | y) \mathbb{E}_{\substack{\mathbf{x} \sim \mathcal{D}_y \\ \tilde{\mathbf{x}} \sim \mathcal{D}_{\bar{y} \neq y}, \\ \tilde{\mathbf{x}}', \tilde{\mathbf{x}}'' \sim \mathcal{D}_{\tilde{\mathbf{x}}}, \\ \alpha', \alpha'' \sim \mathcal{D}_\alpha}} [\ell_{\text{ctr}}(\mathbf{x}^+, \mathbf{x}^{++}, \mathbf{x}^-)] + \Pr(\bar{y} = y | y) \mathbb{E}_{\substack{\mathbf{x} \sim \mathcal{D}_y \\ \tilde{\mathbf{x}} \sim \mathcal{D}_{\bar{y}=y}, \\ \tilde{\mathbf{x}}', \tilde{\mathbf{x}}'' \sim \mathcal{D}_{\tilde{\mathbf{x}}}, \\ \alpha', \alpha'' \sim \mathcal{D}_\alpha}} [\ell_{\text{ctr}}(\mathbf{x}^+, \mathbf{x}^{++}, \mathbf{x}^-)] \\ &= (1 - \rho_y) \mathbb{E}_{\substack{\mathbf{x} \sim \mathcal{D}_y \\ \tilde{\mathbf{x}} \sim \mathcal{D}_{\bar{y} \neq y} \\ \alpha', \alpha'' \sim \mathcal{D}_\alpha}} \mathbb{E}_{\tilde{\mathbf{x}}', \tilde{\mathbf{x}}'' \sim \mathcal{D}_{\tilde{\mathbf{x}}}} [\ell_{\text{ctr}}(\mathbf{x}^+, \mathbf{x}^{++}, \mathbf{x}^-)] + \rho_y \mathbb{E}_{\substack{\mathbf{x} \sim \mathcal{D}_y \\ \tilde{\mathbf{x}} \sim \mathcal{D}_{\bar{y}=y} \\ \alpha', \alpha'' \sim \mathcal{D}_\alpha}} \mathbb{E}_{\tilde{\mathbf{x}}', \tilde{\mathbf{x}}'' \sim \mathcal{D}_{\tilde{\mathbf{x}}}} [\ell_{\text{ctr}}(\mathbf{x}^+, \mathbf{x}^{++}, \mathbf{x}^-)] \\ &= (1 - \rho_y) \mathbb{E}_{\substack{\mathbf{x} \sim \mathcal{D}_y \\ \tilde{\mathbf{x}} \sim \mathcal{D}_{\bar{y} \neq y} \\ \alpha', \alpha'' \sim \mathcal{D}_\alpha}} \mathbb{E}_{\tilde{\mathbf{x}}', \tilde{\mathbf{x}}'' \sim \mathcal{D}_{\tilde{\mathbf{x}}}} \left[ \ell \left( \frac{h(\mathbf{x}^+)^\top \tilde{w}}{\zeta(h(\mathbf{x}^+))}, y \right) \right] + \rho_y \mathbb{E}_{\substack{\mathbf{x} \sim \mathcal{D}_y \\ \tilde{\mathbf{x}} \sim \mathcal{D}_{\bar{y}=y} \\ \alpha', \alpha'' \sim \mathcal{D}_\alpha}} \mathbb{E}_{\tilde{\mathbf{x}}', \tilde{\mathbf{x}}'' \sim \mathcal{D}_{\tilde{\mathbf{x}}}} [\ell_{\text{ctr}}(\mathbf{x}^+, \mathbf{x}^{++}, \mathbf{x}^-)], \end{aligned}$$

which obtain the desired statement for the first term. We now focus on the second term. Using Lemmas 1 and 2, with

$$q = \frac{h(\mathbf{x}^+)^\top}{\zeta(h(\mathbf{x}^+))} \left( \frac{h(\mathbf{x}^{++})}{\zeta(h(\mathbf{x}^{++}))} - \frac{h(\mathbf{x}^-)}{\zeta(h(\mathbf{x}^-))} \right),$$

$$\ell_{\text{ctr}}(\mathbf{x}^+, \mathbf{x}^{++}, \mathbf{x}^-) = \ell(q, 1) = -\log \left( \frac{\exp(q)}{1 + \exp(q)} \right) = -\log \left( \frac{1}{1 + \exp(-q)} \right) = \log(1 + \exp(-q)).$$

Therefore,

$$\begin{aligned} & \mathbb{E}_{\mathbf{x} \sim \mathcal{D}_y} \mathbb{E}_{\tilde{\mathbf{x}} \sim \mathcal{D}_{\bar{y}=y}} \mathbb{E}_{\substack{\tilde{\mathbf{x}}', \tilde{\mathbf{x}}'' \sim \mathcal{D}_{\tilde{\mathbf{x}}} \\ \alpha', \alpha'' \sim \mathcal{D}_\alpha}} [\ell_{\text{ctr}}(\mathbf{x}^+, \mathbf{x}^{++}, \mathbf{x}^-)] \\ &= \mathbb{E}_{\mathbf{x}, \tilde{\mathbf{x}} \sim \mathcal{D}_y} \mathbb{E}_{\substack{\tilde{\mathbf{x}}', \tilde{\mathbf{x}}'' \sim \mathcal{D}_{\tilde{\mathbf{x}}} \\ \alpha', \alpha'' \sim \mathcal{D}_\alpha}} \left[ \log \left( 1 + \exp \left[ -\frac{h(\mathbf{x}^+)^\top}{\zeta(h(\mathbf{x}^+))} \left( \frac{h(\mathbf{x}^{++})}{\zeta(h(\mathbf{x}^{++}))} - \frac{h(\mathbf{x}^-)}{\zeta(h(\mathbf{x}^-))} \right) \right] \right) \right] = E, \end{aligned}$$

which proves the desired statement with  $E$ . We now focus on the lower bound on  $E$ . By using the convexity of  $q \mapsto \log(1 + \exp(-q))$  and Jensen's inequality,

$$E \geq \log \left( 1 + \exp \left[ \mathbb{E}_{\mathbf{x}, \tilde{\mathbf{x}} \sim \mathcal{D}_y} \mathbb{E}_{\substack{\tilde{\mathbf{x}}', \tilde{\mathbf{x}}'' \sim \mathcal{D}_{\tilde{\mathbf{x}}} \\ \alpha', \alpha'' \sim \mathcal{D}_\alpha}} \left[ \frac{h(\mathbf{x}^+)^\top}{\zeta(h(\mathbf{x}^+))} \left( \frac{h(\mathbf{x}^-)}{\zeta(h(\mathbf{x}^-))} - \frac{h(\mathbf{x}^{++})}{\zeta(h(\mathbf{x}^{++}))} \right) \right] \right] \right)$$

$$\begin{aligned}
 &= \log \left( 1 + \exp \left[ \mathbb{E} \left[ \frac{h(\mathbf{x}^+)^\top}{\zeta(h(\mathbf{x}^+))} \frac{h(\mathbf{x}^-)}{\zeta(h(\mathbf{x}^-))} \right] - \mathbb{E} \left[ \frac{h(\mathbf{x}^+)^\top}{\zeta(h(\mathbf{x}^+))} \frac{h(\mathbf{x}^{++})}{\zeta(h(\mathbf{x}^{++}))} \right] \right] \right) \\
 &= \log \left( 1 + \exp \left[ \mathbb{E} \left[ \frac{h(\mathbf{x}^+)^\top}{\zeta(h(\mathbf{x}^+))} \right] \mathbb{E} \left[ \frac{h(\mathbf{x}^-)}{\zeta(h(\mathbf{x}^-))} \right] - \mathbb{E} \left[ \frac{h(\mathbf{x}^+)^\top}{\zeta(h(\mathbf{x}^+))} \frac{h(\mathbf{x}^{++})}{\zeta(h(\mathbf{x}^{++}))} \right] \right] \right)
 \end{aligned}$$

Here, we have

$$\begin{aligned}
 &\mathbb{E}_{\substack{\mathbf{x} \sim \mathcal{D}_y, \\ \tilde{\mathbf{x}}' \sim \mathcal{D}_{\tilde{\mathbf{x}}}, \\ \alpha' \sim \mathcal{D}_\alpha}} \left[ \frac{h(\mathbf{x}^+)^\top}{\zeta(h(\mathbf{x}^+))} \frac{h(\mathbf{x}^{++})}{\zeta(h(\mathbf{x}^{++}))} \right] \\
 &= \mathbb{E}_{\substack{\mathbf{x} \sim \mathcal{D}_y, \\ \tilde{\mathbf{x}}' \sim \mathcal{D}_{\tilde{\mathbf{x}}}, \\ \alpha' \sim \mathcal{D}_\alpha}} \sum_k \left( \frac{h(\mathbf{x}^+)}{\zeta(h(\mathbf{x}^+))} \right)_k \left( \frac{h(\mathbf{x}^{++})}{\zeta(h(\mathbf{x}^{++}))} \right)_k \\
 &= \sum_k \mathbb{E}_{\substack{\mathbf{x} \sim \mathcal{D}_y, \\ \tilde{\mathbf{x}}' \sim \mathcal{D}_{\tilde{\mathbf{x}}}, \\ \alpha' \sim \mathcal{D}_\alpha}} \left( \frac{h(\mathbf{x}^+)}{\zeta(h(\mathbf{x}^+))} \right)_k \left( \frac{h(\mathbf{x}^{++})}{\zeta(h(\mathbf{x}^{++}))} \right)_k \\
 &= \sum_k \mathbb{E} \left[ \left( \frac{h(\mathbf{x}^+)}{\zeta(h(\mathbf{x}^+))} \right)_k \right] \mathbb{E} \left[ \left( \frac{h(\mathbf{x}^{++})}{\zeta(h(\mathbf{x}^{++}))} \right)_k \right] + \sum_k \text{cov} \left( \left( \frac{h(\mathbf{x}^+)}{\zeta(h(\mathbf{x}^+))} \right)_k, \left( \frac{h(\mathbf{x}^{++})}{\zeta(h(\mathbf{x}^{++}))} \right)_k \right) \\
 &= \mathbb{E}_{\mathbf{x} \sim \mathcal{D}_y} \left[ \frac{h(\mathbf{x}^+)^\top}{\zeta(h(\mathbf{x}^+))} \right] \mathbb{E}_{\substack{\tilde{\mathbf{x}}' \sim \mathcal{D}_{\tilde{\mathbf{x}}}, \\ \alpha' \sim \mathcal{D}_\alpha}} \left[ \frac{h(\mathbf{x}^{++})}{\zeta(h(\mathbf{x}^{++}))} \right] + \overline{\text{cov}} \left[ \frac{h(\mathbf{x}^+)}{\zeta(h(\mathbf{x}^+))}, \frac{h(\mathbf{x}^+)}{\zeta(h(\mathbf{x}^+))} \right]
 \end{aligned}$$

Since  $\mathbb{E}_{\substack{\mathbf{x} \sim \mathcal{D}_y, \\ \tilde{\mathbf{x}}' \sim \mathcal{D}_{\tilde{\mathbf{x}}}, \\ \alpha' \sim \mathcal{D}_\alpha}} \left[ \left( \frac{h(\mathbf{x}^{++})}{\zeta(h(\mathbf{x}^{++}))} \right)_k \right] = \mathbb{E}_{\substack{\tilde{\mathbf{x}} \sim \mathcal{D}_y, \\ \tilde{\mathbf{x}}'' \sim \mathcal{D}_{\tilde{\mathbf{x}}}, \\ \alpha'' \sim \mathcal{D}_\alpha}} \left[ \left( \frac{h(\mathbf{x}^-)}{\zeta(h(\mathbf{x}^-))} \right)_k \right]$ ,

$$\begin{aligned}
 &\mathbb{E}_{\mathbf{x} \sim \mathcal{D}_y} \left[ \frac{h(\mathbf{x}^+)^\top}{\zeta(h(\mathbf{x}^+))} \right] \mathbb{E}_{\substack{\tilde{\mathbf{x}}' \sim \mathcal{D}_{\tilde{\mathbf{x}}}, \\ \alpha'' \sim \mathcal{D}_\alpha}} \left[ \frac{h(\mathbf{x}^-)}{\zeta(h(\mathbf{x}^-))} \right] - \mathbb{E}_{\substack{\mathbf{x} \sim \mathcal{D}_y, \\ \tilde{\mathbf{x}}' \sim \mathcal{D}_{\tilde{\mathbf{x}}}, \\ \alpha' \sim \mathcal{D}_\alpha}} \left[ \frac{h(\mathbf{x}^+)^\top}{\zeta(h(\mathbf{x}^+))} \frac{h(\mathbf{x}^{++})}{\zeta(h(\mathbf{x}^{++}))} \right] \\
 &= \mathbb{E} \left[ \frac{h(\mathbf{x}^+)^\top}{\zeta(h(\mathbf{x}^+))} \right] \left( \mathbb{E}_{\substack{\tilde{\mathbf{x}} \sim \mathcal{D}_y, \\ \tilde{\mathbf{x}}'' \sim \mathcal{D}_{\tilde{\mathbf{x}}}, \\ \alpha'' \sim \mathcal{D}_\alpha}} \left[ \frac{h(\mathbf{x}^-)}{\zeta(h(\mathbf{x}^-))} \right] - \mathbb{E}_{\substack{\tilde{\mathbf{x}} \sim \mathcal{D}_y, \\ \tilde{\mathbf{x}}'' \sim \mathcal{D}_{\tilde{\mathbf{x}}}, \\ \alpha'' \sim \mathcal{D}_\alpha}} \left[ \frac{h(\mathbf{x}^{++})}{\zeta(h(\mathbf{x}^{++}))} \right] \right) - \overline{\text{cov}} \left[ \frac{h(\mathbf{x}^+)}{\zeta(h(\mathbf{x}^+))}, \frac{h(\mathbf{x}^{++})}{\zeta(h(\mathbf{x}^{++}))} \right] \\
 &= -\overline{\text{cov}} \left[ \frac{h(\mathbf{x}^+)}{\zeta(h(\mathbf{x}^+))}, \frac{h(\mathbf{x}^{++})}{\zeta(h(\mathbf{x}^{++}))} \right]
 \end{aligned}$$

Substituting this to the above inequality on  $E$ ,

$$E \geq \log \left( 1 + \exp \left[ -\overline{\text{cov}} \left[ \frac{h(\mathbf{x}^+)}{\zeta(h(\mathbf{x}^+))}, \frac{h(\mathbf{x}^{++})}{\zeta(h(\mathbf{x}^{++}))} \right] \right] \right),$$

which proves the desired statement for the lower bound on  $E$ . □

With these lemmas, we are now ready to prove Theorem 1:

*Proof of Theorem 1.* From Lemma 5, we have that

$$\begin{aligned}
 &\mathbb{E}_{\tilde{y}|y} \mathbb{E}_{\substack{\mathbf{x} \sim \mathcal{D}_y, \\ \tilde{\mathbf{x}} \sim \mathcal{D}_{\tilde{y}}}} \mathbb{E}_{\substack{\tilde{\mathbf{x}}', \tilde{\mathbf{x}}'' \sim \mathcal{D}_{\tilde{\mathbf{x}}}, \\ \alpha', \alpha'' \sim \mathcal{D}_\alpha}} [\ell_{\text{ctr}}(\mathbf{x}^+, \mathbf{x}^{++}, \mathbf{x}^-)] \\
 &= (1 - \rho_y) \mathbb{E}_{\substack{\mathbf{x} \sim \mathcal{D}_y, \\ \tilde{\mathbf{x}} \sim \mathcal{D}_{\tilde{y}}}} \mathbb{E}_{\substack{\tilde{\mathbf{x}}', \tilde{\mathbf{x}}'' \sim \mathcal{D}_{\tilde{\mathbf{x}}}, \\ \alpha', \alpha'' \sim \mathcal{D}_\alpha}} \left[ \ell_{\text{cf}} \left( \frac{h(\mathbf{x}^+)^\top \tilde{w}}{\zeta(h(\mathbf{x}^+))}, y \right) \right] + \rho_y E
 \end{aligned}$$

By taking expectation over  $y$  in both sides,

$$\mathbb{E}_{y, \tilde{y}} \mathbb{E}_{\substack{\mathbf{x} \sim \mathcal{D}_y, \\ \tilde{\mathbf{x}} \sim \mathcal{D}_{\tilde{y}}}} \mathbb{E}_{\substack{\tilde{\mathbf{x}}', \tilde{\mathbf{x}}'' \sim \mathcal{D}_{\tilde{\mathbf{x}}}, \\ \alpha', \alpha'' \sim \mathcal{D}_\alpha}} [\ell_{\text{ctr}}(\mathbf{x}^+, \mathbf{x}^{++}, \mathbf{x}^-)]$$

$$= \mathbb{E}_y \mathbb{E}_{\mathbf{x} \sim \mathcal{D}_y, \tilde{\mathbf{x}} \sim \mathcal{D}_{\tilde{y} \neq y}} \mathbb{E}_{\tilde{\mathbf{x}}', \tilde{\mathbf{x}}'' \sim \mathcal{D}_{\tilde{x}}, \alpha', \alpha'' \sim \mathcal{D}_\alpha} \left[ (1 - \rho_y) \ell_{\text{cf}} \left( \frac{h(\mathbf{x}^+)^\top \tilde{w}}{\zeta(h(\mathbf{x}^+))}, y \right) \right] + \mathbb{E}_y [\rho_y E]$$

Since  $\mathbb{E}_y \mathbb{E}_{\mathbf{x} \sim \mathcal{D}_y} [\varphi(x)] = \mathbb{E}_{(\mathbf{x}, y) \sim \mathcal{D}} [\varphi(x)] = \mathbb{E}_{\mathbf{x} \sim \mathcal{D}_x} [\varphi(x)]$  given a function  $\varphi$  of  $x$ , we have

$$\begin{aligned} & \mathbb{E}_{\mathbf{x}, \tilde{\mathbf{x}} \sim \mathcal{D}_x, \tilde{\mathbf{x}}', \tilde{\mathbf{x}}'' \sim \mathcal{D}_{\tilde{x}}, \alpha', \alpha'' \sim \mathcal{D}_\alpha} [\ell_{\text{ctr}}(\mathbf{x}^+, \mathbf{x}^{++}, \mathbf{x}^-)] \\ &= \mathbb{E}_{(\mathbf{x}, y) \sim \mathcal{D}} \mathbb{E}_{\tilde{\mathbf{x}} \sim \mathcal{D}_{\tilde{y}}, \tilde{\mathbf{x}}', \tilde{\mathbf{x}}'' \sim \mathcal{D}_{\tilde{x}}, \alpha', \alpha'' \sim \mathcal{D}_\alpha} \left[ \bar{\rho}(y) \ell_{\text{cf}} \left( \frac{h(\mathbf{x}^+)^\top \tilde{w}}{\zeta(h(\mathbf{x}^+))}, y \right) \right] + \mathbb{E}_y [(1 - \bar{\rho}(y)) E] \end{aligned}$$

Taking expectations over  $\tilde{\mathbf{x}} \sim \mathcal{D}_{\tilde{x}}$  and  $\alpha \sim \mathcal{D}_\alpha$  in both sides yields the desired statement.  $\square$

## B.2. Proof of Theorem 2

We begin by introducing additional notation. Define  $\ell_{f,y}(q) = \ell(f(q), y)$  and  $\ell_y(q) = \ell(q, y)$ . Note that  $\ell(f(q), y) = \ell_{f,y}(q) = (\ell_y \circ f)(q)$ . The following shows that the contrastive pre-training is related to minimizing the standard classification loss  $\ell(f(\mathbf{x}), y)$  while regularizing the change of the loss values in the direction of  $\delta(\mathbf{x}, \tilde{\mathbf{x}})$ :

**Lemma 6.** *Assume that  $\ell_{f,y}$  is twice differentiable. Then there exists a function  $\varphi$  such that  $\lim_{q \rightarrow 0} \varphi(q) = 0$  and*

$$\ell(f(\mathbf{x}^+), y) = \ell(f(\mathbf{x}), y) + \alpha \nabla \ell_{f,y}(\mathbf{x})^\top \delta(\mathbf{x}, \tilde{\mathbf{x}}) + \frac{\alpha^2}{2} \delta(\mathbf{x}, \tilde{\mathbf{x}})^\top \nabla^2 \ell_{f,y}(\mathbf{x}) \delta(\mathbf{x}, \tilde{\mathbf{x}}) + \alpha^2 \varphi(\alpha).$$

*Proof.* Let  $\mathbf{x}$  be an arbitrary point in the domain of  $f$ . Let  $\varphi_0(\alpha) = \ell(f(\mathbf{x}^+), y) = \ell_{f,y}(\mathbf{x} + \alpha \delta(\mathbf{x}, \tilde{\mathbf{x}}))$ . Then, using the definition of the twice-differentiability of function  $\varphi_0$ , there exists a function  $\varphi$  such that

$$\ell(f(\mathbf{x}^+), y) = \varphi_0(\alpha) = \varphi_0(0) + \varphi_0'(0)\alpha + \frac{1}{2} \varphi_0''(0)\alpha^2 + \alpha^2 \varphi(\alpha), \quad (12)$$

where  $\lim_{\alpha \rightarrow 0} \varphi(\alpha) = 0$ . By chain rule,

$$\begin{aligned} \varphi_0'(\alpha) &= \frac{\partial \ell(f(\mathbf{x}^+), y)}{\partial \alpha} = \frac{\partial \ell(f(\mathbf{x}^+), y)}{\partial \mathbf{x}^+} \frac{\partial \mathbf{x}^+}{\partial \alpha} = \frac{\partial \ell(f(\mathbf{x}^+), y)}{\partial \mathbf{x}^+} \delta(\mathbf{x}, \tilde{\mathbf{x}}) = \nabla \ell_{f,y}(\mathbf{x}^+)^\top \delta(\mathbf{x}, \tilde{\mathbf{x}}) \\ \varphi_0''(\alpha) &= \delta(\mathbf{x}, \tilde{\mathbf{x}})^\top \left[ \frac{\partial}{\partial \alpha} \left( \frac{\partial \ell(f(\mathbf{x}^+), y)}{\partial \mathbf{x}^+} \right)^\top \right] = \delta(\mathbf{x}, \tilde{\mathbf{x}})^\top \left[ \frac{\partial}{\partial \mathbf{x}^+} \left( \frac{\partial \ell(f(\mathbf{x}^+), y)}{\partial \mathbf{x}^+} \right)^\top \right] \frac{\partial \mathbf{x}^+}{\partial \alpha} \\ &= \delta(\mathbf{x}, \tilde{\mathbf{x}})^\top \nabla^2 \ell_{f,y}(\mathbf{x}^+) \delta(\mathbf{x}, \tilde{\mathbf{x}}) \end{aligned}$$

Therefore,

$$\begin{aligned} \varphi_0'(0) &= \nabla \ell_{f,y}(\mathbf{x})^\top \delta(\mathbf{x}, \tilde{\mathbf{x}}) \\ \varphi_0''(0) &= \delta(\mathbf{x}, \tilde{\mathbf{x}})^\top \nabla^2 \ell_{f,y}(\mathbf{x}) \delta(\mathbf{x}, \tilde{\mathbf{x}}). \end{aligned}$$

By substituting this to the above equation based on the definition of twice differentiability,

$$\ell(f(\mathbf{x}^+), y) = \varphi_0(\alpha) = \ell(f(\mathbf{x}), y) + \alpha \nabla \ell_{f,y}(\mathbf{x})^\top \delta(\mathbf{x}, \tilde{\mathbf{x}}) + \frac{\alpha^2}{2} \delta(\mathbf{x}, \tilde{\mathbf{x}})^\top \nabla^2 \ell_{f,y}(\mathbf{x}) \delta(\mathbf{x}, \tilde{\mathbf{x}}) + \alpha^2 \varphi(\alpha). \quad \square$$

Whereas the above lemma is at the level of loss, we now analyze the phenomena at the level of model:

**Lemma 7.** *Let  $\mathbf{x}$  be a fixed point in the domain of  $f$ . Given the fixed  $\mathbf{x}$ , let  $w \in \mathcal{W}$  be a point such that  $\nabla f(\mathbf{x})$  and  $\nabla^2 f(\mathbf{x})$  exist. Assume that  $f(\mathbf{x}) = \nabla f(\mathbf{x})^\top \mathbf{x}$  and  $\nabla^2 f(\mathbf{x}) = 0$ . Then we have*

$$\begin{aligned} & \ell(f(\mathbf{x}^+), y) \\ &= \ell(f(\mathbf{x}), y) + \alpha (\psi(f(\mathbf{x})) - y) \nabla f(\mathbf{x})^\top \delta(\mathbf{x}, \tilde{\mathbf{x}}) + \frac{\alpha^2}{2} \psi'(f(\mathbf{x})) |\nabla f(\mathbf{x})^\top \delta(\mathbf{x}, \tilde{\mathbf{x}})|^2 + \alpha^2 \varphi(\alpha), \end{aligned}$$

where  $\psi'(\cdot) = \psi(\cdot)(1 - \psi(\cdot)) > 0$ .

*Proof.* Under these conditions,

$$\nabla \ell_{f,y}(\mathbf{x}) = \nabla(\ell_y \circ f)(\mathbf{x}) = \ell'_y(f(\mathbf{x}))\nabla f(\mathbf{x})$$

$$\nabla^2 \ell_{f,y}(\mathbf{x}) = \ell''_y(f(\mathbf{x}))\nabla f(\mathbf{x})\nabla f(\mathbf{x})^\top + \ell'_y(f(\mathbf{x}))\nabla^2 f(\mathbf{x}) = \ell''_y(f(\mathbf{x}))\nabla f(\mathbf{x})\nabla f(\mathbf{x})^\top$$

Substituting these into Lemma 6 yields

$$\begin{aligned} \ell(f(\mathbf{x}^+), y) &= \ell(f(\mathbf{x}), y) + \alpha \ell'_y(f(\mathbf{x}))\nabla f(\mathbf{x})^\top \delta(\mathbf{x}, \tilde{\mathbf{x}}) + \frac{\alpha^2}{2} \ell''_y(f(\mathbf{x}))\delta(\mathbf{x}, \tilde{\mathbf{x}})^\top [\nabla f(\mathbf{x})\nabla f(\mathbf{x})^\top] \delta(\mathbf{x}, \tilde{\mathbf{x}}) + \alpha^2 \varphi(\alpha) \\ &= \ell(f(\mathbf{x}), y) + \alpha \ell'_y(f(\mathbf{x}))\nabla f(\mathbf{x})^\top \delta(\mathbf{x}, \tilde{\mathbf{x}}) + \frac{\alpha^2}{2} \ell''_y(f(\mathbf{x}))[\nabla f(\mathbf{x})^\top \delta(\mathbf{x}, \tilde{\mathbf{x}})]^2 + \alpha^2 \varphi(\alpha) \end{aligned}$$

Using Lemma 1, we can rewrite this loss as follows:

$$\ell(f(\mathbf{x}), y) = -\log \frac{\exp(yf(\mathbf{x}))}{1 + \exp(f(\mathbf{x}))} = \log[1 + \exp(f(\mathbf{x}))] - yf(\mathbf{x}) = \psi_0(f(\mathbf{x})) - yf(\mathbf{x})$$

where  $\psi_0(q) = \log[1 + \exp(q)]$ . Thus,

$$\ell'_y(f(\mathbf{x})) = \psi'_0(f(\mathbf{x})) - y = \psi(f(\mathbf{x})) - y$$

$$\ell''_y(f(\mathbf{x})) = \psi''_0(f(\mathbf{x})) = \psi'(f(\mathbf{x}))$$

Substituting these into the above equation, we have

$$\begin{aligned} \ell(f(\mathbf{x}^+), y) &= \ell(f(\mathbf{x}), y) + \alpha(\psi(f(\mathbf{x})) - y)\nabla f(\mathbf{x})^\top \delta(\mathbf{x}, \tilde{\mathbf{x}}) + \frac{\alpha^2}{2} \psi'(f(\mathbf{x}))[\nabla f(\mathbf{x})^\top \delta(\mathbf{x}, \tilde{\mathbf{x}})]^2 + \alpha^2 \varphi(\alpha) \end{aligned}$$

□

The following lemma shows that Mixup version is related to minimize the standard classification loss plus the regularization term on  $\|\nabla f(\mathbf{x})\|$ .

**Lemma 8.** Let  $\delta(\mathbf{x}, \tilde{\mathbf{x}}) = \tilde{\mathbf{x}} - \mathbf{x}$ . Let  $\mathbf{x}$  be a fixed point in the domain of  $f$ . Given the fixed  $\mathbf{x}$ , let  $w \in \mathcal{W}$  be a point such that  $\nabla f(\mathbf{x})$  and  $\nabla^2 f(\mathbf{x})$  exist. Assume that  $f(\mathbf{x}) = \nabla f(\mathbf{x})^\top \mathbf{x}$  and  $\nabla^2 f(\mathbf{x}) = 0$ . Assume that  $\mathbb{E}_{\tilde{\mathbf{x}}[\tilde{\mathbf{x}}]} = 0$ . Then, if  $yf(\mathbf{x}) + (y-1)f(\mathbf{x}) \geq 0$ ,

$$\begin{aligned} \mathbb{E}_{\tilde{\mathbf{x}}}\ell(f(\mathbf{x}^+), y) &= \ell(f(\mathbf{x}), y) + c_1(\mathbf{x})\|\nabla f(\mathbf{x})\|_2 + c_2(\mathbf{x})\|\nabla f(\mathbf{x})\|_2^2 + c_3(\mathbf{x})\|\nabla f(\mathbf{x})\|_{\mathbb{E}_{\tilde{\mathbf{x}} \sim \mathcal{D}_{\tilde{\mathbf{x}}}}[\tilde{\mathbf{x}}^\top]}^2 + O(\alpha^3), \end{aligned}$$

where

$$c_1(\mathbf{x}) = \alpha |\cos(\nabla f(\mathbf{x}), \mathbf{x})| |y - \psi(f(\mathbf{x}))| \|\mathbf{x}\|_2 \geq 0$$

$$c_2(\mathbf{x}) = \frac{\alpha^2 |\cos(\nabla f(\mathbf{x}), \mathbf{x})|^2 \|\mathbf{x}\|_2^2 |\psi'(f(\mathbf{x}))|}{2} \geq 0$$

$$c_3(\mathbf{x}) = \frac{\alpha^2}{2} |\psi'(f(\mathbf{x}))| > 0.$$

*Proof.* Using Lemma 7 with  $\delta(\mathbf{x}, \tilde{\mathbf{x}}) = \tilde{\mathbf{x}} - \mathbf{x}$ ,

$$\begin{aligned} \ell(f(\mathbf{x}^+), y) &= \ell(f(\mathbf{x}), y) + \alpha(\psi(f(\mathbf{x})) - y)\nabla f(\mathbf{x})^\top (\tilde{\mathbf{x}} - \mathbf{x}) + \frac{\alpha^2}{2} \psi'(f(\mathbf{x}))|\nabla f(\mathbf{x})^\top (\tilde{\mathbf{x}} - \mathbf{x})|^2 + \alpha^2 \varphi(\alpha) \\ &= \ell(f(\mathbf{x}), y) - \alpha(\psi(f(\mathbf{x})) - y)\nabla f(\mathbf{x})^\top (\mathbf{x} - \tilde{\mathbf{x}}) + \frac{\alpha^2}{2} \psi'(f(\mathbf{x}))|\nabla f(\mathbf{x})^\top (\mathbf{x} - \tilde{\mathbf{x}})|^2 + \alpha^2 \varphi(\alpha) \\ &= \ell(f(\mathbf{x}), y) - \alpha(\psi(f(\mathbf{x})) - y)(f(\mathbf{x}) - \nabla f(\mathbf{x})^\top \tilde{\mathbf{x}}) + \frac{\alpha^2}{2} \psi'(f(\mathbf{x}))|f(\mathbf{x}) - \nabla f(\mathbf{x})^\top \tilde{\mathbf{x}}|^2 + \alpha^2 \varphi(\alpha) \end{aligned}$$

$$= \ell(f(\mathbf{x}), y) + \alpha(y - \psi(f(\mathbf{x}))) (f(\mathbf{x}) - \nabla f(\mathbf{x})^\top \tilde{\mathbf{x}}) + \frac{\alpha^2}{2} \psi'(f(\mathbf{x})) |f(\mathbf{x}) - \nabla f(\mathbf{x})^\top \tilde{\mathbf{x}}|^2 + \alpha^2 \varphi(\alpha)$$

Therefore, using  $\mathbb{E}_{\tilde{\mathbf{x}}} \tilde{\mathbf{x}} = 0$ ,

$$\begin{aligned} & \mathbb{E}_{\tilde{\mathbf{x}}} \ell(f(\mathbf{x}^+), y) \\ &= \ell(f(\mathbf{x}), y) + \alpha[y - \psi(f(\mathbf{x}))] f(\mathbf{x}) + \frac{\alpha^2}{2} \psi'(f(\mathbf{x})) \mathbb{E}_{\tilde{\mathbf{x}}} |f(\mathbf{x}) - \nabla f(\mathbf{x})^\top \tilde{\mathbf{x}}|^2 + \mathbb{E}_{\tilde{\mathbf{x}}} \alpha^2 \varphi(\alpha) \end{aligned}$$

Since  $|f(\mathbf{x}) - \nabla f(\mathbf{x})^\top \tilde{\mathbf{x}}|^2 = f(\mathbf{x})^2 - 2f(\mathbf{x}) \nabla f(\mathbf{x})^\top \tilde{\mathbf{x}} + (\nabla f(\mathbf{x})^\top \tilde{\mathbf{x}})^2$ ,

$$\begin{aligned} \mathbb{E}_{\tilde{\mathbf{x}}} |f(\mathbf{x}) - \nabla f(\mathbf{x})^\top \tilde{\mathbf{x}}|^2 &= f(\mathbf{x})^2 + \mathbb{E}_{\tilde{\mathbf{x}}} (\nabla f(\mathbf{x})^\top \tilde{\mathbf{x}})^2 \\ &= f(\mathbf{x})^2 + \nabla f(\mathbf{x})^\top \mathbb{E}_{\tilde{\mathbf{x}}} [\tilde{\mathbf{x}} \tilde{\mathbf{x}}^\top] \nabla f(\mathbf{x}). \end{aligned}$$

Thus,

$$\begin{aligned} & \mathbb{E}_{\tilde{\mathbf{x}}} \ell(f(\mathbf{x}^+), y) \\ &= \ell(f(\mathbf{x}), y) + \alpha[y - \psi(f(\mathbf{x}))] f(\mathbf{x}) + \frac{\alpha^2}{2} |\psi'(f(\mathbf{x}))| [f(\mathbf{x})^2 + \nabla f(\mathbf{x})^\top \mathbb{E}_{\tilde{\mathbf{x}}} [\tilde{\mathbf{x}} \tilde{\mathbf{x}}^\top] \nabla f(\mathbf{x})] + \mathbb{E}_{\tilde{\mathbf{x}}} \alpha^2 \varphi(\alpha) \end{aligned}$$

The assumption that  $yf(\mathbf{x}) + (y-1)f(\mathbf{x}) \geq 0$  implies that  $f(\mathbf{x}) \geq 0$  if  $y = 1$  and  $f(\mathbf{x}) \leq 0$  if  $y = 0$ . Thus, if  $y = 1$ ,

$$[y - \psi(f(\mathbf{x}))] f(\mathbf{x}) = [1 - \psi(f(\mathbf{x}))] f(\mathbf{x}) \geq 0,$$

since  $f(\mathbf{x}) \geq 0$  and  $(1 - \psi(f(\mathbf{x}))) \geq 0$  due to  $\psi(f(\mathbf{x})) \in (0, 1)$ . If  $y = 0$ ,

$$[y - \psi(f(\mathbf{x}))] f(\mathbf{x}) = -\psi(f(\mathbf{x})) f(\mathbf{x}) \geq 0,$$

since  $f(\mathbf{x}) \leq 0$  and  $-\psi(f(\mathbf{x})) < 0$ . Therefore, in both cases,

$$[y - \psi(f(\mathbf{x}))] f(\mathbf{x}) \geq 0,$$

which implies that,

$$\begin{aligned} y - \psi(f(\mathbf{x})) &= [y - \psi(f(\mathbf{x}))] f(\mathbf{x}) \\ &= |y - \psi(f(\mathbf{x}))| \|\nabla f(\mathbf{x})^\top \mathbf{x}\| \\ &= |y - \psi(f(\mathbf{x}))| \|\nabla f(\mathbf{x})\| \|\mathbf{x}\| \cos(\nabla f(\mathbf{x}), \mathbf{x}) \end{aligned}$$

Therefore, substituting this and using  $f(\mathbf{x}) = \|\nabla f(\mathbf{x})\| \|\mathbf{x}\| \cos(\nabla f(\mathbf{x}), \mathbf{x})$

$$\begin{aligned} & \mathbb{E}_{\tilde{\mathbf{x}}} \ell(f(\mathbf{x}^+), y) \\ &= \ell(f(\mathbf{x}), y) + c_1(\mathbf{x}) \|\nabla f(\mathbf{x})\|_2 + c_2(\mathbf{x}) \|\nabla f(\mathbf{x})\|_2^2 + c_3(\mathbf{x}) \nabla f(\mathbf{x})^\top \mathbb{E}_{\tilde{\mathbf{x}}} [\tilde{\mathbf{x}} \tilde{\mathbf{x}}^\top] \nabla f(\mathbf{x}) + \mathbb{E}_{\tilde{\mathbf{x}}} [\alpha^2 \varphi(\alpha)]. \end{aligned}$$

□

In the case of Gaussian-noise, we have  $\delta(\mathbf{x}, \tilde{\mathbf{x}}) = \tilde{\mathbf{x}} \sim \mathcal{N}(0, \sigma^2 I)$ :

**Lemma 9.** *Let  $\delta(\mathbf{x}, \tilde{\mathbf{x}}) = \tilde{\mathbf{x}} \sim \mathcal{N}(0, \sigma^2 I)$ . Let  $\mathbf{x}$  be a fixed point in the domain of  $f$ . Given the fixed  $\mathbf{x}$ , let  $w \in \mathcal{W}$  be a point such that  $\nabla f(\mathbf{x})$  and  $\nabla^2 f(\mathbf{x})$  exist. Assume that  $f(\mathbf{x}) = \nabla f(\mathbf{x})^\top \mathbf{x}$  and  $\nabla^2 f(\mathbf{x}) = 0$ . Then*

$$\mathbb{E}_{\tilde{\mathbf{x}} \sim \mathcal{N}(0, \sigma^2 I)} \ell(f(\mathbf{x}^+), y) = \ell(f(\mathbf{x}), y) + \sigma^2 c_3(\mathbf{x}) \|\nabla f(\mathbf{x})\|_2^2 + \alpha^2 \varphi(\alpha)$$

where

$$c_3(\mathbf{x}) = \frac{\alpha^2}{2} |\psi'(f(\mathbf{x}))| > 0.$$

*Proof.* With  $\delta(\mathbf{x}, \tilde{\mathbf{x}}) = \tilde{\mathbf{x}} \sim \mathcal{N}(0, \sigma^2 I)$ , Lemma 7 yields

$$\begin{aligned} & \ell(f(\mathbf{x}^+), y) \\ &= \ell(f(\mathbf{x}), y) + \alpha(\psi(f(\mathbf{x})) - y) \nabla f(\mathbf{x})^\top \tilde{\mathbf{x}} + \frac{\alpha^2}{2} \psi'(f(\mathbf{x})) |\nabla f(\mathbf{x})^\top \tilde{\mathbf{x}}|^2 + \alpha^2 \varphi(\alpha), \end{aligned}$$

Thus,

$$\begin{aligned} & \mathbb{E}_{\tilde{\mathbf{x}} \sim \mathcal{N}(0, \sigma^2 I)} \ell(f(\mathbf{x}^+), y) \\ &= \ell(f(\mathbf{x}), y) + \frac{\alpha^2}{2} \psi'(f(\mathbf{x})) \mathbb{E}_{\tilde{\mathbf{x}} \sim \mathcal{N}(0, \sigma^2 I)} |\nabla f(\mathbf{x})^\top \tilde{\mathbf{x}}|^2 + \alpha^2 \varphi(\alpha) \\ &= \ell(f(\mathbf{x}), y) + \frac{\alpha^2}{2} \psi'(f(\mathbf{x})) \nabla f(\mathbf{x})^\top \mathbb{E}_{\tilde{\mathbf{x}} \sim \mathcal{N}(0, \sigma^2 I)} [\tilde{\mathbf{x}} \tilde{\mathbf{x}}^\top] \nabla f(\mathbf{x}) + \alpha^2 \varphi(\alpha) \\ &= \ell(f(\mathbf{x}), y) + \frac{\alpha^2}{2} \psi'(f(\mathbf{x})) \|\nabla f(\mathbf{x})\|_{\mathbb{E}_{\tilde{\mathbf{x}} \sim \mathcal{N}(0, \sigma^2 I)} [\tilde{\mathbf{x}} \tilde{\mathbf{x}}^\top]}^2 + \alpha^2 \varphi(\alpha) \end{aligned}$$

By noticing that  $\|w\|_{\mathbb{E}_{\tilde{\mathbf{x}} \sim \mathcal{N}(0, \sigma^2 I)} [\tilde{\mathbf{x}} \tilde{\mathbf{x}}^\top]}^2 = \sigma^2 w^\top I w = \sigma^2 \|w\|_2^2$ , this implies the desired statement.  $\square$

Combining Lemmas 8–9 yield the statement of Theorem 2.

### B.3. Proof of Theorem 3

*Proof.* Applying the standard result (Bartlett & Mendelson, 2002) yields that with probability at least  $1 - \delta$ ,

$$\mathbb{E}_{(\mathbf{x}, y)} [1_{[(2y-1) \neq \text{sign}(f(\mathbf{x}))]}] - \frac{1}{n} \sum_{i=1}^n \phi((2y_i - 1)f(\mathbf{x}_i)) \leq 4L_\phi \mathcal{R}_n(\mathcal{F}_b^{(\text{mix})}) + \sqrt{\frac{\ln(2/\delta)}{2n}}.$$

The rest of the proof bounds the Rademacher complexity  $\mathcal{R}_n(\mathcal{F}_b^{(\text{mix})})$ .

$$\begin{aligned} \hat{\mathcal{R}}_n(\mathcal{F}_b^{(\text{mix})}) &= \mathbb{E}_\xi \sup_{f \in \mathcal{F}_b} \frac{1}{n} \sum_{i=1}^n \xi_i f(\mathbf{x}_i) \\ &= \mathbb{E}_\xi \sup_{w: \|w\|_{\mathbb{E}_{\tilde{\mathbf{x}} \sim \mathcal{D}_{\mathbf{x}}} [\tilde{\mathbf{x}} \tilde{\mathbf{x}}^\top]} \leq b} \frac{1}{n} \sum_{i=1}^n \xi_i w^\top \mathbf{x}_i \\ &= \mathbb{E}_\xi \sup_{w: w^\top \Sigma_X w \leq b} \frac{1}{n} \sum_{i=1}^n \xi_i (\Sigma_X^{1/2} w)^\top \Sigma_X^{\dagger/2} \mathbf{x}_i \\ &\leq \frac{1}{n} \mathbb{E}_\xi \sup_{w: w^\top \Sigma_X w \leq b} \|\Sigma_X^{1/2} w\|_2 \left\| \sum_{i=1}^n \xi_i \Sigma_X^{\dagger/2} \mathbf{x}_i \right\|_2 \\ &\leq \frac{\sqrt{b}}{n} \mathbb{E}_\xi \sqrt{\sum_{i=1}^n \sum_{j=1}^n \xi_i \xi_j (\Sigma_X^{\dagger/2} \mathbf{x}_i)^\top (\Sigma_X^{\dagger/2} \mathbf{x}_j)} \\ &\leq \frac{\sqrt{b}}{n} \sqrt{\mathbb{E}_\xi \sum_{i=1}^n \sum_{j=1}^n \xi_i \xi_j (\Sigma_X^{\dagger/2} \mathbf{x}_i)^\top (\Sigma_X^{\dagger/2} \mathbf{x}_j)} \\ &= \frac{\sqrt{b}}{n} \sqrt{\sum_{i=1}^n (\Sigma_X^{\dagger/2} \mathbf{x}_i)^\top (\Sigma_X^{\dagger/2} \mathbf{x}_i)} \\ &= \frac{\sqrt{b}}{n} \sqrt{\sum_{i=1}^n \mathbf{x}_i^\top \Sigma_X^\dagger \mathbf{x}_i} \end{aligned}$$

Therefore,

$$\begin{aligned}
 \mathcal{R}_n(\mathcal{F}_b^{(\text{mix})}) &= \mathbb{E}_S \hat{\mathcal{R}}_n(\mathcal{F}_b^{(\text{mix})}) = \mathbb{E}_S \frac{\sqrt{b}}{n} \sqrt{\sum_{i=1}^n \mathbf{x}_i^\top \Sigma_X^\dagger \mathbf{x}_i} \\
 &\leq \frac{\sqrt{b}}{n} \sqrt{\sum_{i=1}^n \mathbb{E}_{\mathbf{x}_i} \mathbf{x}_i^\top \Sigma_X^\dagger \mathbf{x}_i} \\
 &= \frac{\sqrt{b}}{n} \sqrt{\sum_{i=1}^n \mathbb{E}_{\mathbf{x}_i} \sum_{k,l} (\Sigma_X^\dagger)_{kl} (\mathbf{x}_i)_k (\mathbf{x}_i)_l} \\
 &= \frac{\sqrt{b}}{n} \sqrt{\sum_{i=1}^n \sum_{k,l} (\Sigma_X^\dagger)_{kl} \mathbb{E}_{\mathbf{x}_i} (\mathbf{x}_i)_k (\mathbf{x}_i)_l} \\
 &= \frac{\sqrt{b}}{n} \sqrt{\sum_{i=1}^n \sum_{k,l} (\Sigma_X^\dagger)_{kl} (\Sigma_X)_{kl}} \\
 &= \frac{\sqrt{b}}{n} \sqrt{\sum_{i=1}^n \text{tr}(\Sigma_X^\top \Sigma_X^\dagger)} \\
 &= \frac{\sqrt{b}}{n} \sqrt{\sum_{i=1}^n \text{tr}(\Sigma_X \Sigma_X^\dagger)} \\
 &= \frac{\sqrt{b}}{n} \sqrt{\sum_{i=1}^n \text{rank}(\Sigma_X)} \\
 &\leq \frac{\sqrt{b} \sqrt{\text{rank}(\Sigma_X)}}{\sqrt{n}}
 \end{aligned}$$

□

### C. Best Hyperparameter Values for Various Experiments

In general, we found that our method works well for a large range of  $\alpha$  values ( $\alpha \in [0.6, 0.9]$ ) and  $\rho$  values ( $\rho \in [0.1, 0.5]$ ). In Table 5, 6 and 7, we present the best hyperparameter values for the experiments in Section 5.

| Method         | Fashion-MNIST                        | CIFAR10                                |
|----------------|--------------------------------------|----------------------------------------|
| Gaussian-noise | Gaussian-mean=0.1, $\tau=1.0$        | Gaussian-mean=0.05, $\tau=1.0$         |
| DACL           | $\alpha=0.9$ , $\tau=1.0$            | $\alpha=0.9$ , $\tau=1.0$              |
| DACL+          | $\alpha=0.6$ , $\tau=1$ , $\rho=0.1$ | $\alpha=0.7$ , $\tau=1.0$ , $\rho=0.5$ |

Table 5. Best hyperparameter values for experiments on Tabular data (Table 1)

| Method         | CIFAR10                          | CIFAR100                         |
|----------------|----------------------------------|----------------------------------|
| Gaussian-noise | Gaussian-mean=0.05, $\tau=0.1$   | Gaussian-mean=0.05, $\tau=0.1$   |
| DACL           | $\alpha=0.9, \tau=1.0$           | $\alpha=0.9, \tau=1.0$           |
| DACL+          | $\alpha=0.9, \rho=0.1, \tau=1.0$ | $\alpha=0.9, \rho=0.5, \tau=1.0$ |
| SimCLR         | $\tau=0.5$                       | $\tau=0.5$                       |
| SimCLR+DACL    | $\alpha=0.7, \tau=1.0$           | $\alpha=0.7, \tau=1.0$           |

Table 6. Best hyperparameter values for experiment of CIFAR10/100 dataset (Table 2)

| Method         | ImageNet                      |
|----------------|-------------------------------|
| Gaussian-noise | Gaussian-mean=0.1, $\tau=1.0$ |
| DACL           | $\alpha=0.9, \tau=1.0$        |
| SimCLR         | $\tau=0.1$                    |
| SimCLR+DACL    | $\alpha=0.9, \tau=0.1$        |

Table 7. Best hyperparameter values for experiments on ImageNet data (Table 3)
